# Supplementary material
Source: PubMed Central journal article supplement (PMC6832862)
Supplement: NIHMS1540754-supplement-1.pdf [file NIHMS1540754-supplement-1.pdf]

## Supplemental Data:

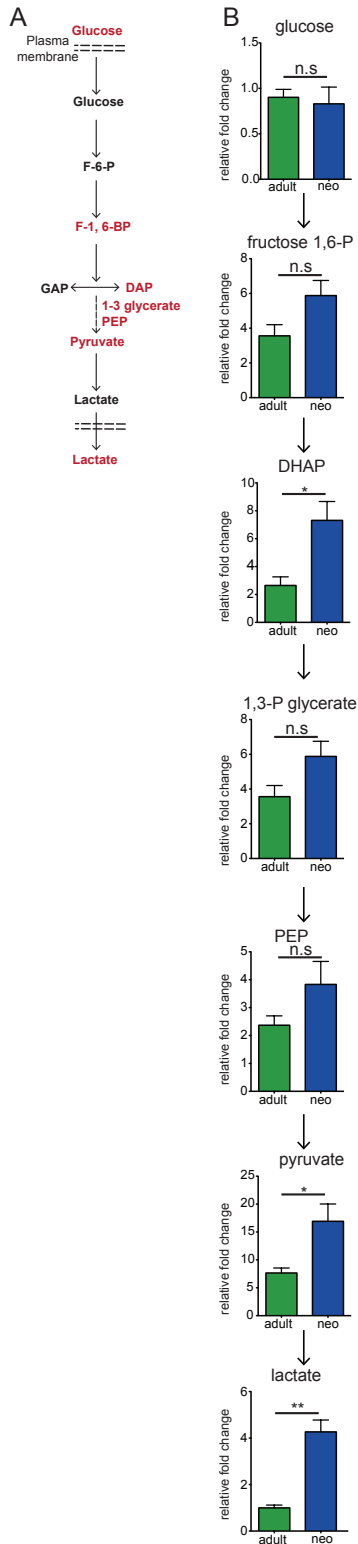

**Supplemental Fig 1. Measurements of metabolites in OXPHOS and glycolytic pathways post-activation *in vitro*.** (a) Pathway of critical metabolites in glycolysis. (b) Metabolomics was performed on adult and neonatal gBT-I CD8<sup>+</sup> T cells 18-hour post-activation *in vitro*. Data has been normalized to measurements collected prior to stimulation. Significance was determined by student *t* test. Data representative of two independent experiments with 3 biological replicates/group. \**P* < .05 and \*\**P* < .005.

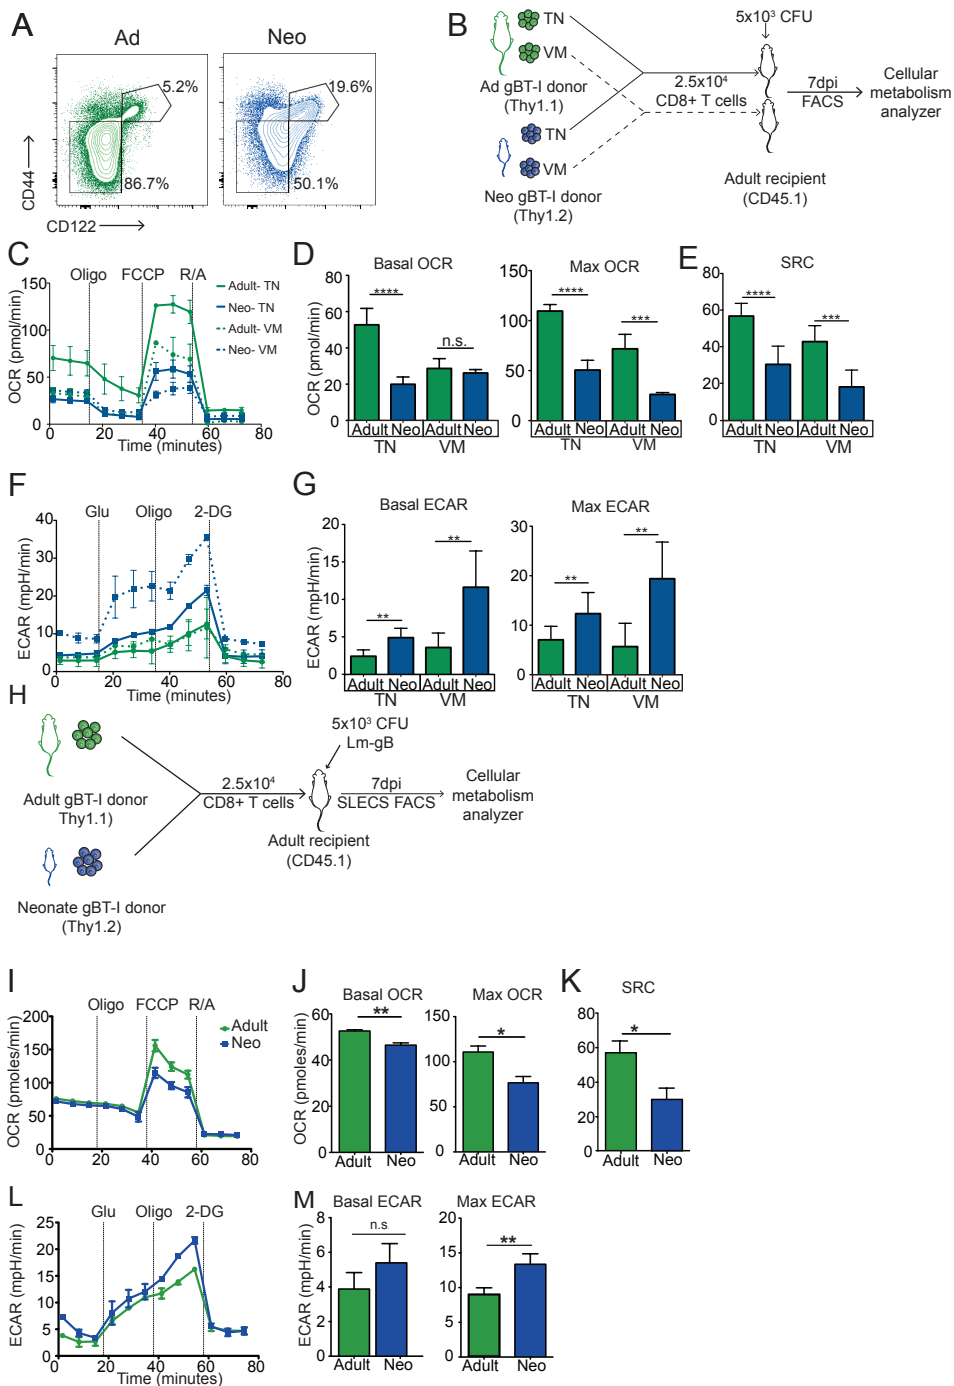

**Supplemental Fig 2. Metabolic programs are governed by cell intrinsic factors.** (a) Representative contour plots of the TN and VM populations in uninfected adult and neonatal mice. (b) The experimental design to examine if the starting phenotype plays a deterministic role in metabolic programs (c) OCR measurements (d) Basal and max OCR values, (e) SRC values in mice at 7 dpi from a mitochondria stress test (f) ECAR measurements, (g) basal and max ECAR values from a glycolysis stress test at 7 dpi. Data are representative of two independent experiments. (h) Schematic of the experimental design to examine if the effector phenotype influences metabolic differences between neonatal and adult T cells (i) OCR measurements, (j) Basal and max OCR, (k) SRC values in adult and neonatal SLECs during a Mitochondrial Stress Test at 7 dpi (l) ECAR measurements, (m) Basal and max ECAR values of adult and neonatal CD8+ T cells during a Glycolysis Stress Test at 7 dpi. Data representative of 2-4 independent experiments with 3 biological replicates/group. \*  $p < 0.05$ , \*\*  $p < 0.005$ , \*\*\*  $p < 0.0005$ , \*\*\*\*  $p < 0.00005$  by an a two-way ANOVA followed by a Tukey post-hoc test (C-G) and an unpaired student t-test (I-M).
